# Supplementary material for: Carbon/ZrO2 aerogel composite microtube superfoam
Source: Royal Society of Chemistry journal article supplement (doi:10.1039/d4ra00109e), 2024-01-01
Supplement: d4ra00109e1.pdf [file d4ra00109e1.pdf]

Supporting Information For

## **Carbon/ZrO<sub>2</sub> Aerogel Composite Microtube Superfoam**

Ding Han<sup>1</sup> Xiankai Sun<sup>1\*</sup> Shichao Zhang<sup>1</sup> Linghao Wu<sup>1</sup> Bing Ai<sup>1</sup> Haoran Sun<sup>1</sup>

Yufeng Chen<sup>1</sup>

<sup>1</sup> China Building Materials Academy Co., Ltd, No.1 Guan Zhuang Dong Li, Chaoyang

District, Beijing, 100024, P. R. China

---

Xiankai Sun (✉)

E-mail: sunxiankai2008@163.com; Tel: +86 010-51167551

Ding Han: tjuhd@163.com, Shichao Zhang: zhangshichao@cbma.com.cn, Linghao

Wu: 16116339@bjtu.edu.cn, Bing Ai: aibing2018@163.com, Haoran Sun: moto398@126.com,

Yufeng Chen: chenyunfeng@tom.com

<sup>1</sup> China Building Materials Academy Co., Ltd., No.1 Guan Zhuang Dong Li, Chaoyang District,  
Beijing, 100024, P. R. China

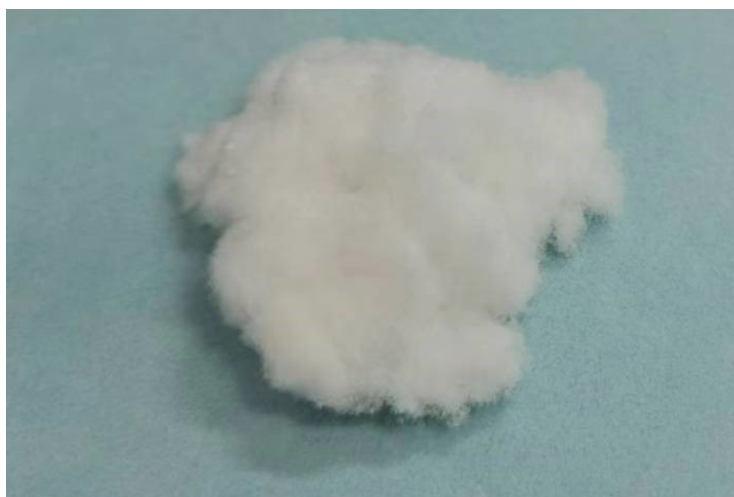

Fig. S1 The image of the cellulose microtube.

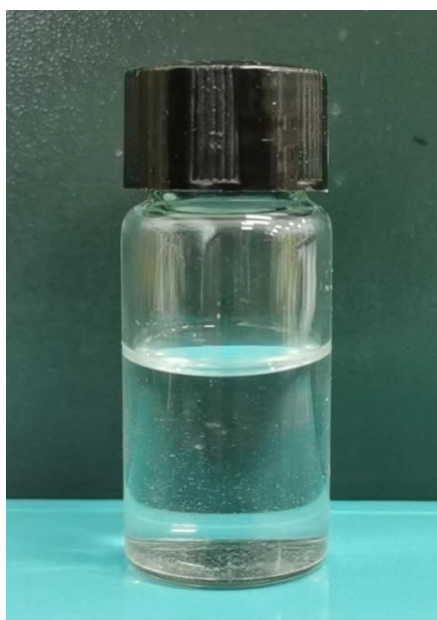

Fig. S2 The image of the ZrO<sub>2</sub> aerogel precursor solution (5%).

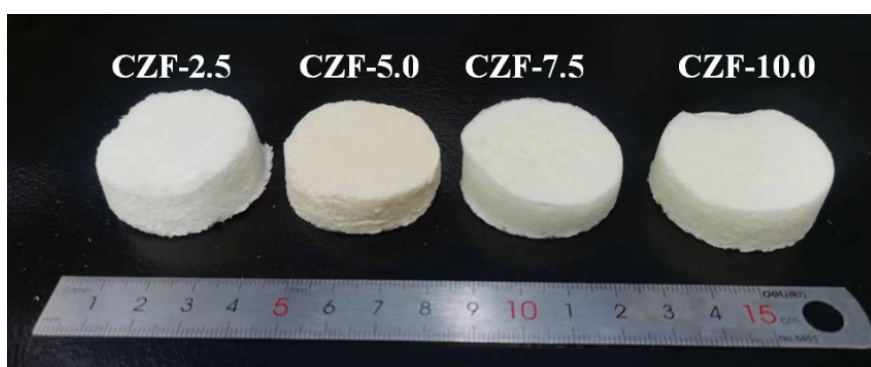

Fig. S3 The image of the CZF-X superfoam.

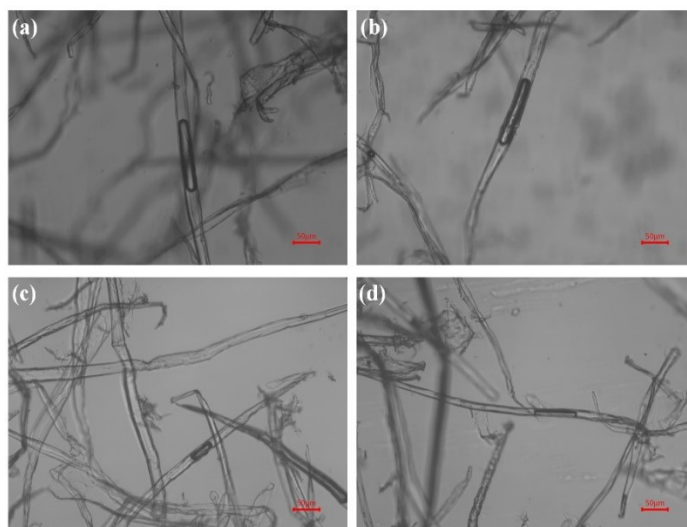

Fig. S4 Bubbles that appear transiently in cellulose microtubules after the precursor solution

2.5%(a), 5.0%(b), 7.5%(c), and 10.0%(d) is adsorbed by cellulose microtubules.

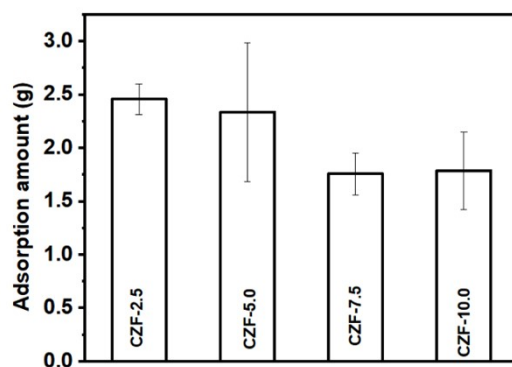

Fig. S5 The mass of the different  $ZrO_2$  aerogel precursor solution adsorbed by cellulose

microtubules (0.5 g).

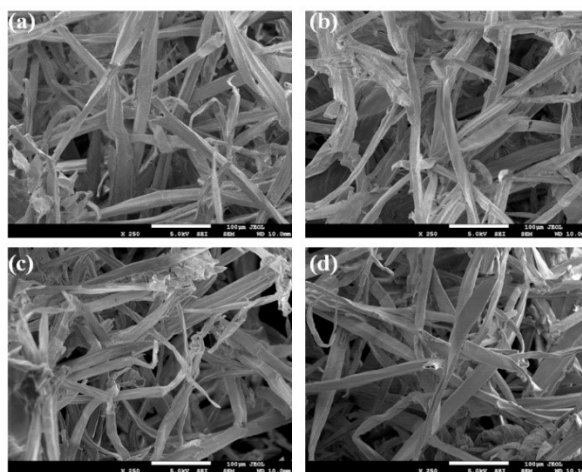

Fig. S6 SEM image of the CZF-X superfoam.

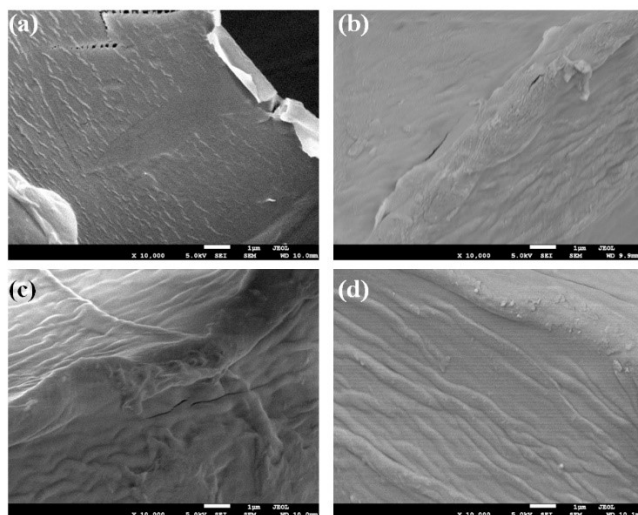

Fig. S7 SEM image of the CZF-X superfoam.

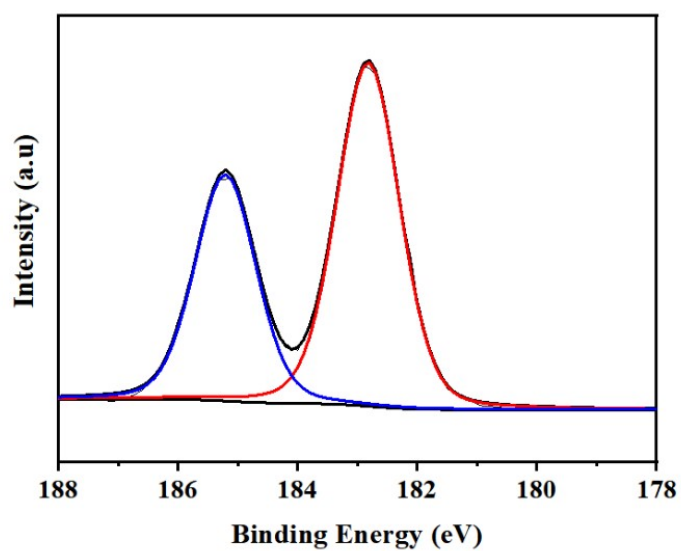

Fig. S8 the high resolution Zr 3d spectrum of the CZF-5.0 superfoam.

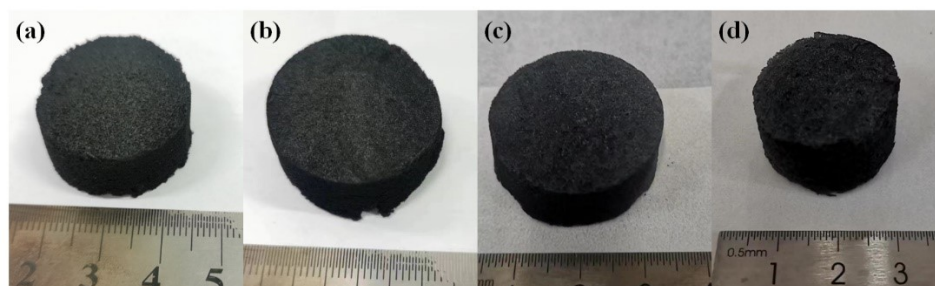

Fig. S9 The image of the CZF-5.0-600 (a), CZF-5.0-800 (b), CZF-5.0-1000 (c), and CZF-5.0-1200 (d) superfoam.

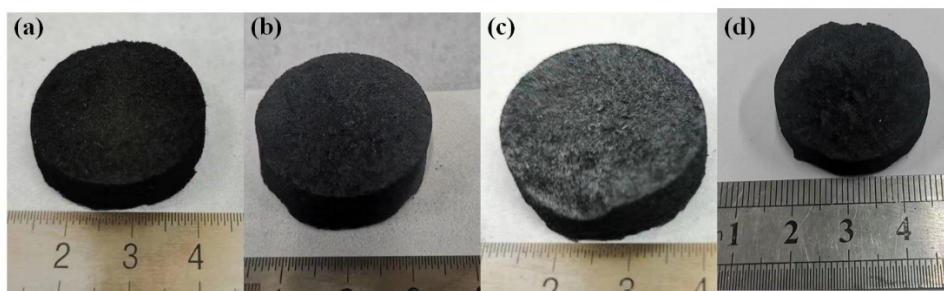

Fig. S10 The image of the CZF-2.5-1000 (a), CZF-5.0-1000 (b), CZF-7.5-1000 (c), and CZF-10.0-1200 (d) superfoam.

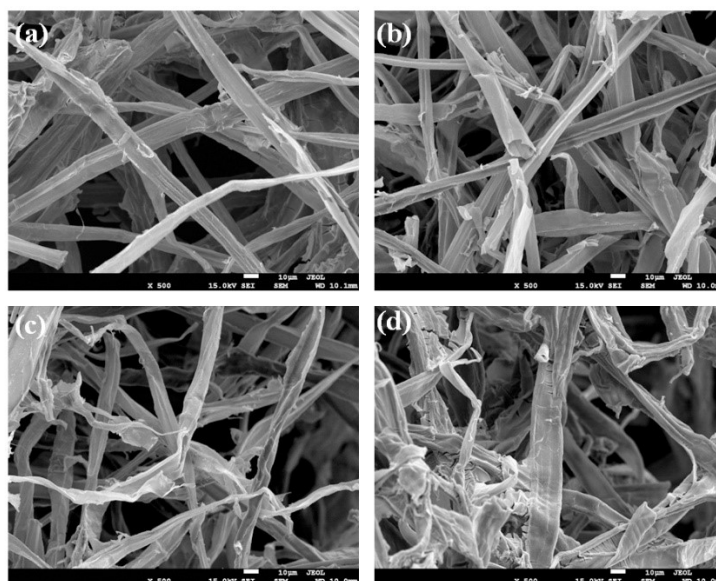

Fig. S11 The SEM image of the CZF-5.0-600 (a), CZF-5.0-800 (b), CZF-5.0-1000 (c), and CZF-5.0-1200 (d) superfoam.

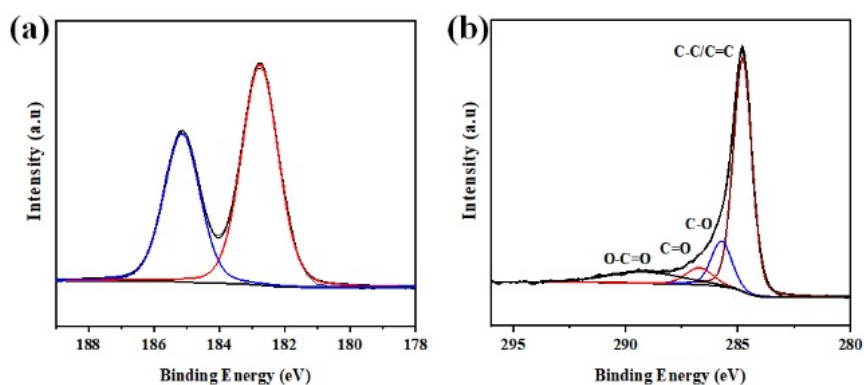

Fig. S12 The high resolution Zr 3d and C 1s spectrum of the CZF-5.0-1000 superfoam.

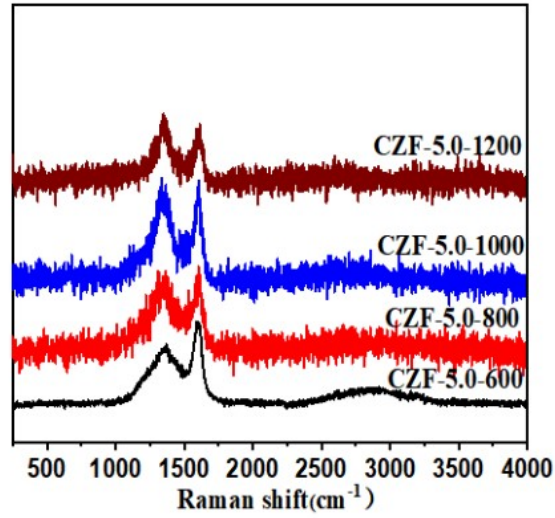

Fig. S13 The Raman spectra of the CZF-5.0-X superfoam.

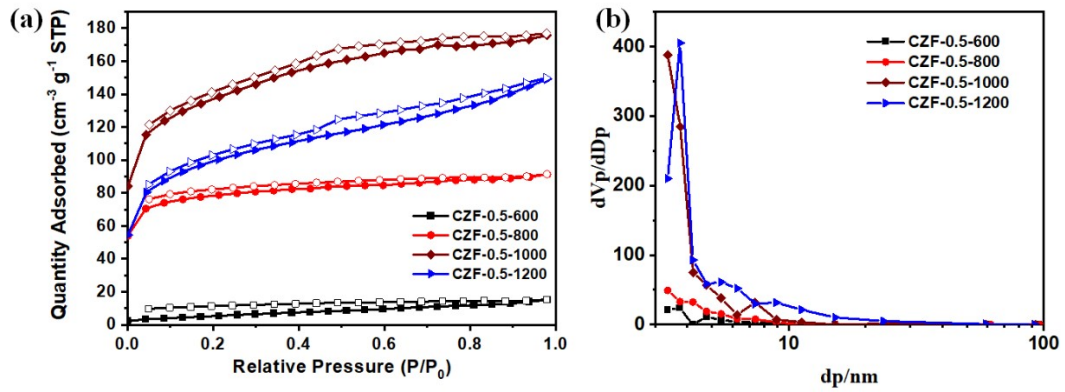

Fig. S14 N<sub>2</sub> adsorption-desorption isotherm (a) and pore size distribution (b) of the CZF-5.0-Y superfoam.

Table S1 The pore structure parameters of the CZF-5.0-Y superfoam.

| Sample       | $S_{\text{BET}}$ (m <sup>2</sup> g <sup>-1</sup> ) | $V_{\text{total}}$ (cm <sup>3</sup> g <sup>-1</sup> ) | $D_{\text{average}}$ (nm) |
|--------------|----------------------------------------------------|-------------------------------------------------------|---------------------------|
| CZF-5.0-600  | 20                                                 | 0.0234                                                | 4.5                       |
| CZF-5.0-800  | 295                                                | 0.1413                                                | 1.9                       |
| CZF-5.0-1000 | 494                                                | 0.2717                                                | 2.2                       |
| CZF-5.0-1200 | 353                                                | 0.2306                                                | 2.6                       |

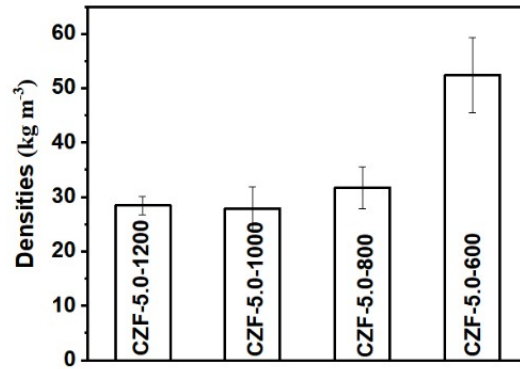

Fig. S15 The density of the CZF-5.0-600 (a), CZF-5.0-800 (b), CZF-5.0-1000 (c), and CZF-5.0-1200 (d) superfoam.

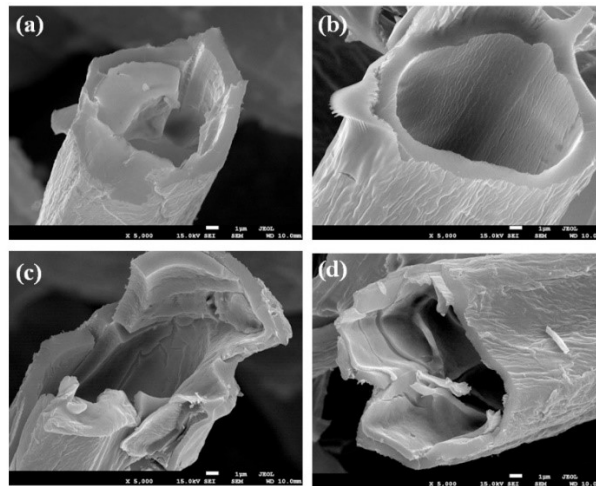

Fig. S16 SEM image of the CZF-2.5-1000 (a), CZF-5.0-1000 (b), CZF-7.5-1000 (c), and CZF-10.0-1200 (d) superfoam.

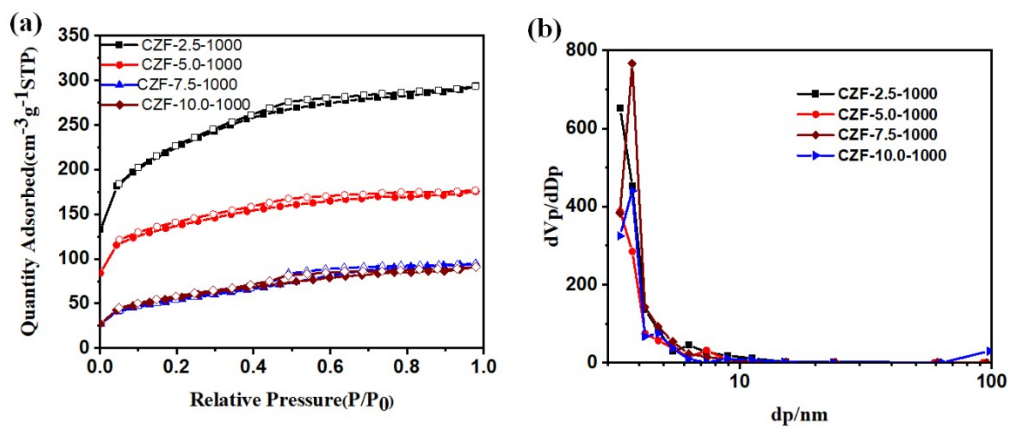

Fig. S17 N<sub>2</sub> adsorption-desorption isotherm (a) and pore size distribution (b) of the CZF-5.0-Y superfoam.

Table S2 The pore structure parameters of the CZF-5.0-Y superfoam.

| Sample        | $S_{\text{BET}}$ ( $\text{m}^2 \text{g}^{-1}$ ) | $V_{\text{total}}$ ( $\text{cm}^3 \text{g}^{-1}$ ) | $D_{\text{average}}$ (nm) |
|---------------|-------------------------------------------------|----------------------------------------------------|---------------------------|
| CZF-2.5-1000  | 796                                             | 0.4541                                             | 2.3                       |
| CZF-5.0-1000  | 494                                             | 0.2717                                             | 2.2                       |
| CZF-7.5-1000  | 188                                             | 0.1457                                             | 3.1                       |
| CZF-10.0-1000 | 198                                             | 0.1412                                             | 2.8                       |

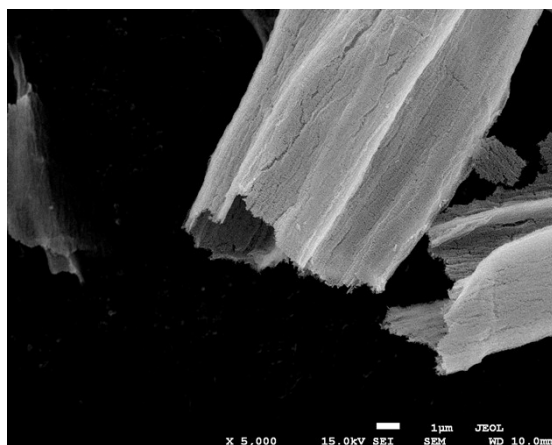

Fig. S18 SEM image of the of  $\text{ZrO}_2$  microtubes on ablation surface of the CZF-5.0-1000.
